# Supplementary material for: Metabolomic Profiling of Antioxidant Compounds in Five Vachellia Species
Source: MDPI journal article supplement (doi:10.3390/molecules26206214), 2021-10-14
Supplement: s1 [file s1]

*Supplementary material*

# Metabolomic Profiling of Antioxidant Compounds in Five *Vachellia* Species

Garland Kgosi More <sup>1,\*</sup>, Stephen Meddows-Taylor <sup>2</sup> and Gerhard Prinsloo <sup>3</sup>

<sup>1</sup> College of Agriculture and Environmental Sciences Laboratories, University of South Africa, Florida, Johannesburg, 1710, South Africa

<sup>2</sup> Department of Life and Consumer Sciences, College of Agriculture and Environmental Sciences, University of South Africa, Florida, Johannesburg, 1710, South Africa; mtayls@unisa.ac.za

<sup>3</sup> Department of Agriculture and Animal Health, College of Agriculture and Environmental Sciences, University of South Africa, Florida, Johannesburg, 1710, South Africa; prinsg@unisa.ac.za

\* Correspondence: moregk@unisa.ac.za

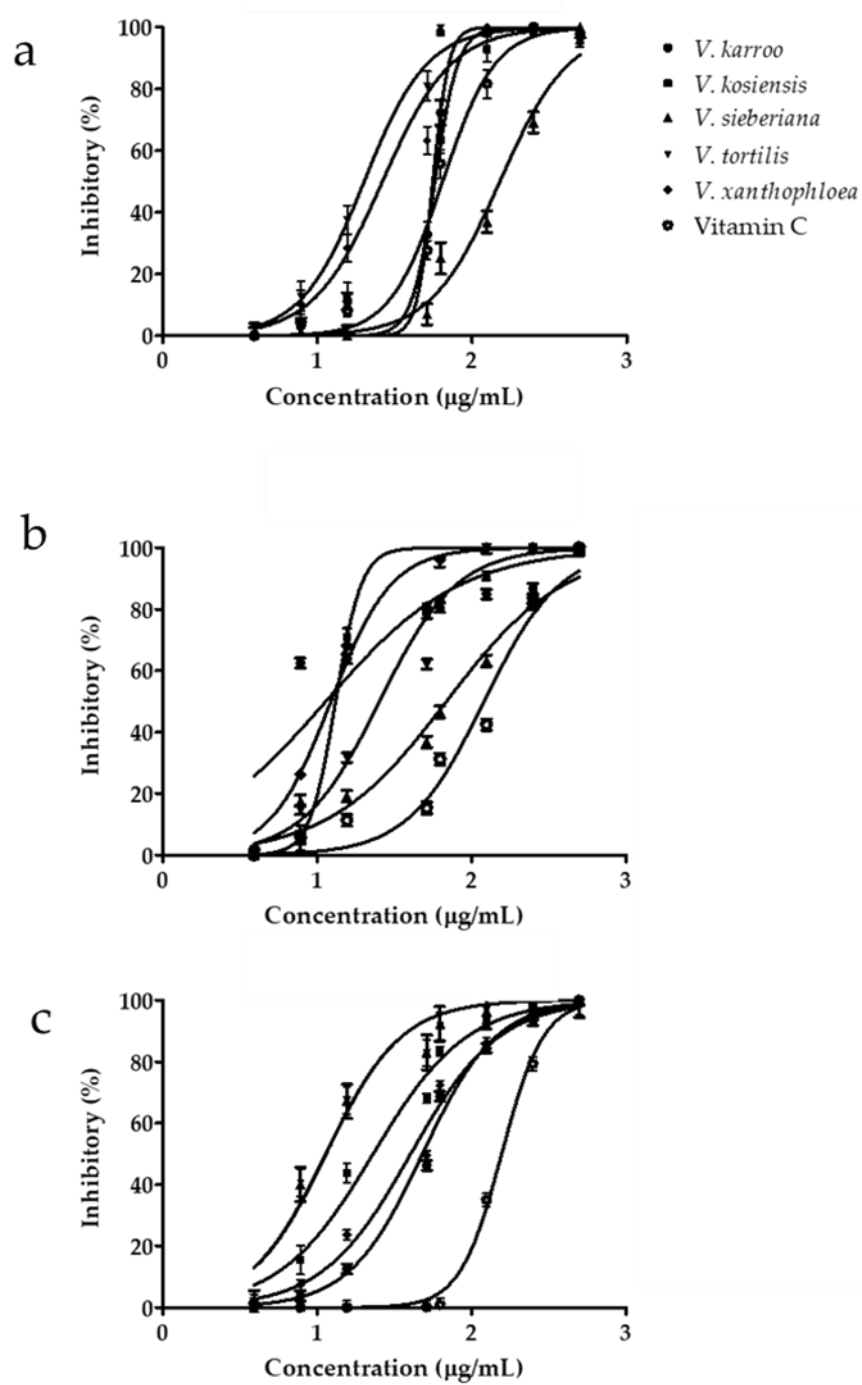

**Figure S1.** Sigmoidal curved graphs of concentration response of five *Vachellia* extracts against DPPH (a), ABTS (b) and FRAP (c) with  $R^2$  coefficient  $\geq 0.9$ .

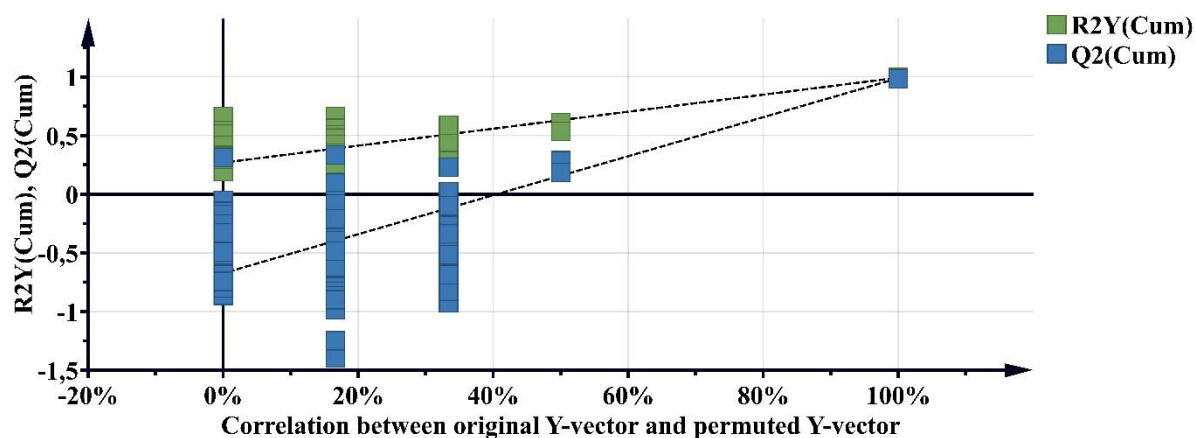

**Figure S2.** The OPLS-DA derived validation plot (permutation times  $n = 100$ ) of *Vachellia* samples showing model intercepts of Intercepts:  $R^2 = (0.0, 0.269)$ ,  $Q^2 = (0.0, -0.674)$ .

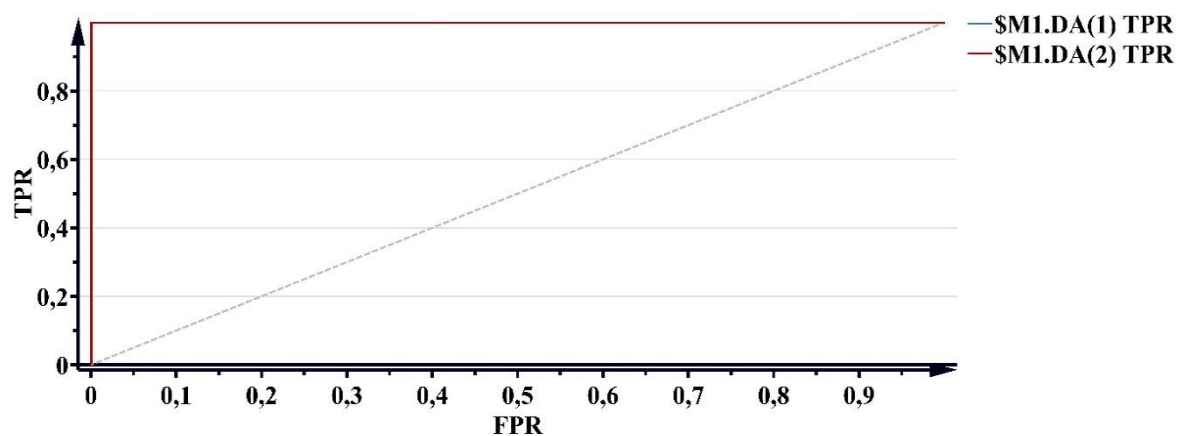

**Figure S3.** A receiver operating characteristic curve (ROC) area under a curve (AUC) plot with predictably accuracy values of 0.994 and 0.945.

**Table S1.** Cross validated ANOVA (CV ANOVA) with a  $p$  value ( $1.23 \times 10^{-16}$ ) of CV ANOVA.

| M1(Untitled) | SS       | DF | MS        | F       | p           | SD       |
|--------------|----------|----|-----------|---------|-------------|----------|
| Total corr.  | 24       | 24 | 1         |         |             | 1        |
| Regression   | 23,737   | 6  | 3,95616   | 270,732 | 1,23003e-16 | 1,98901  |
| Residual     | 0,263031 | 18 | 0,0146128 |         |             | 0,120884 |

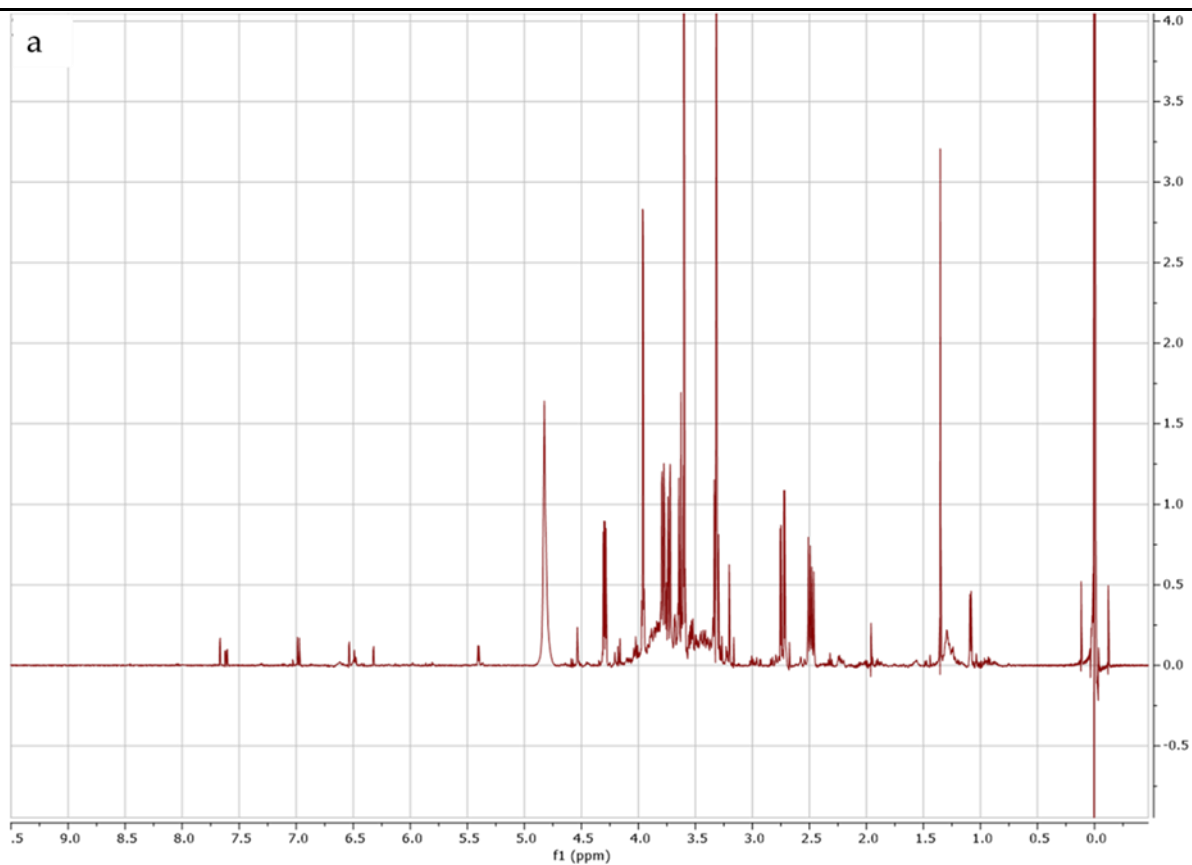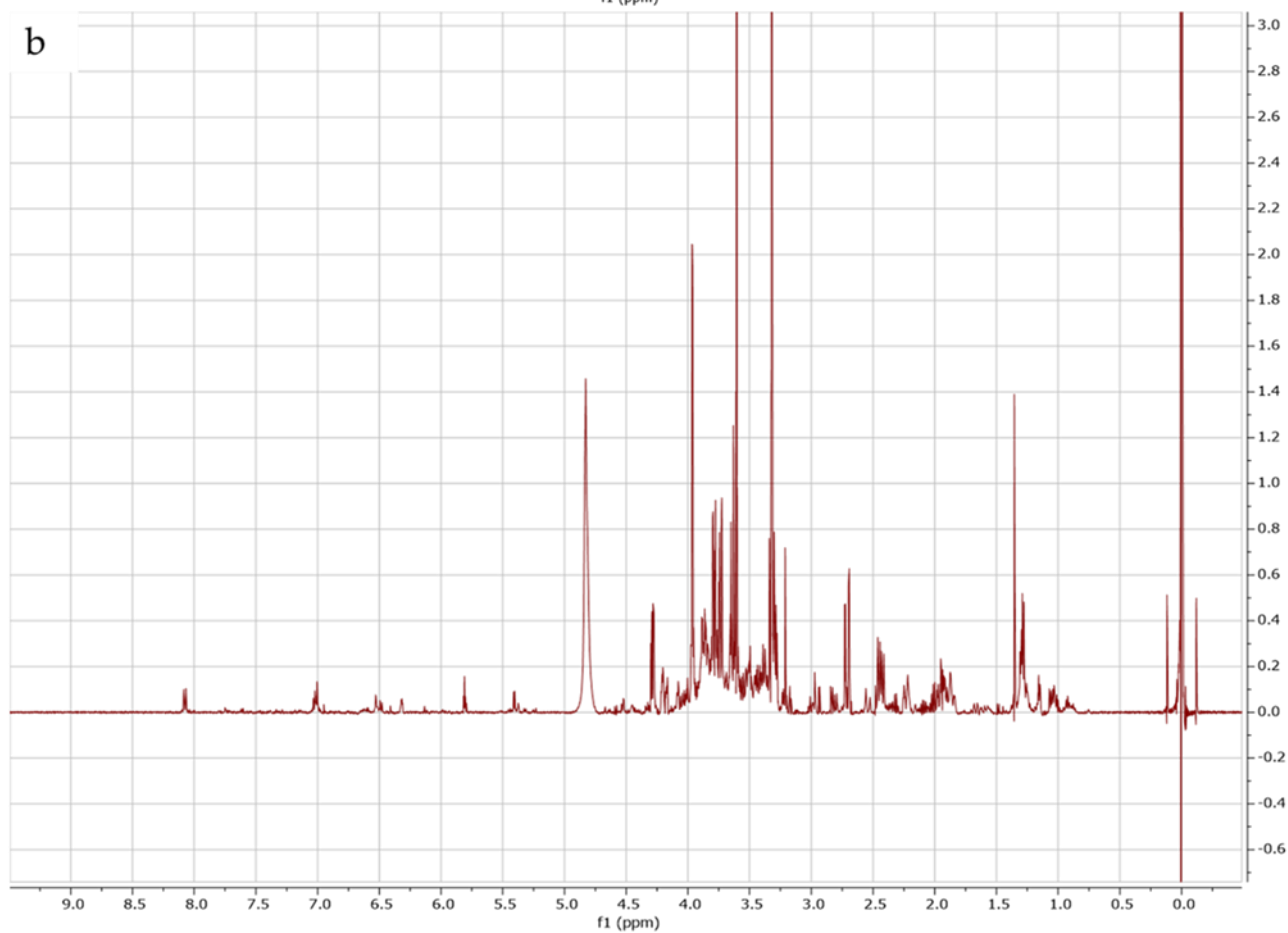

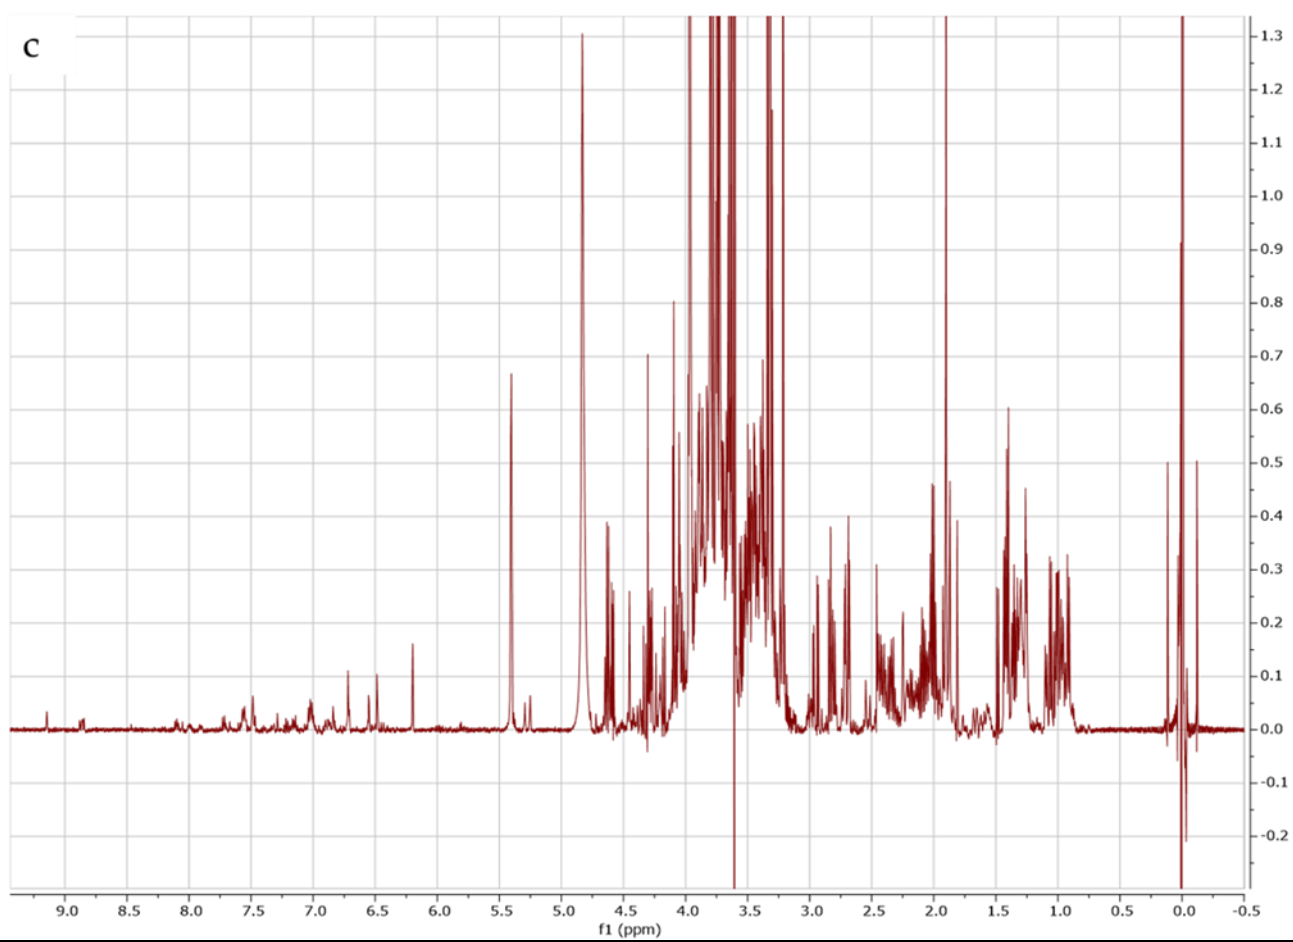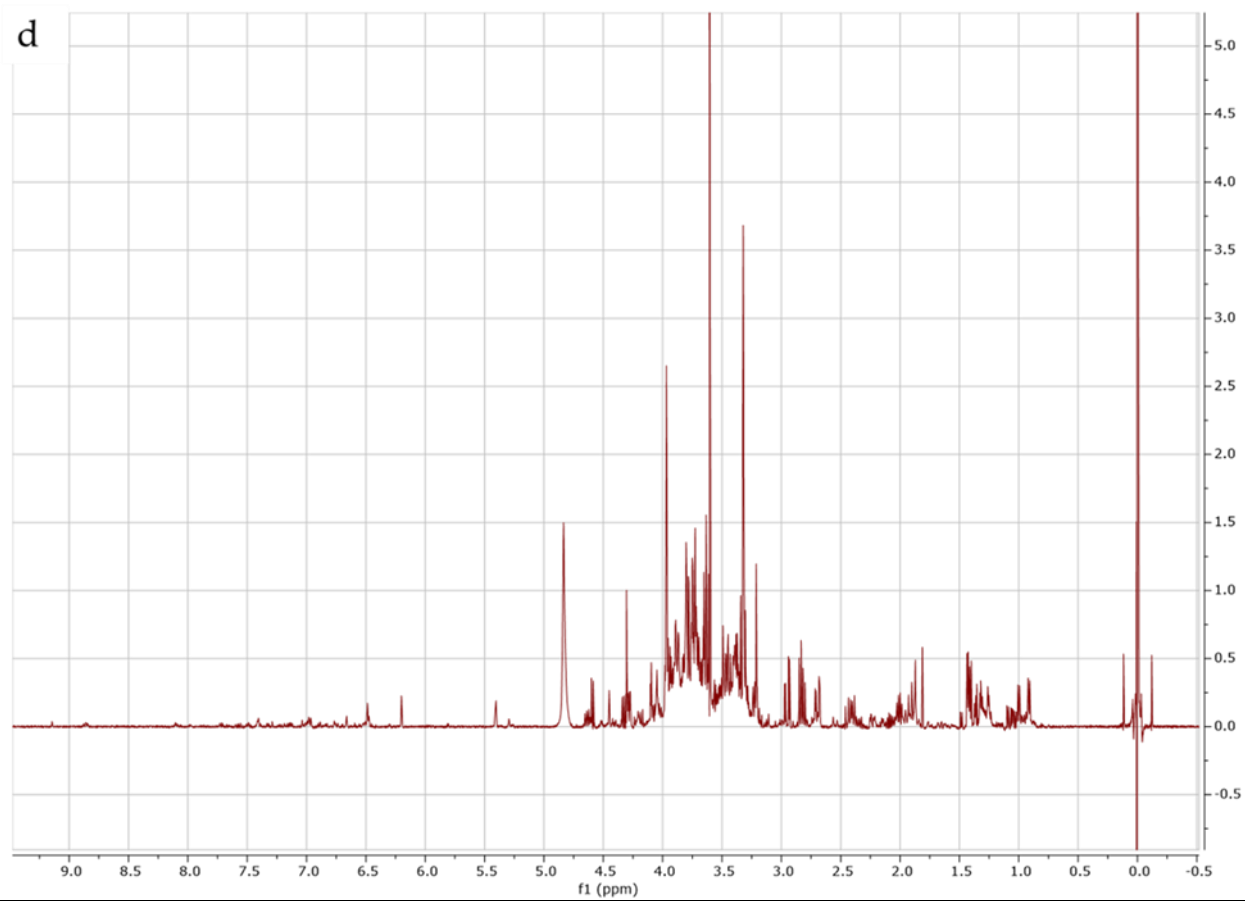

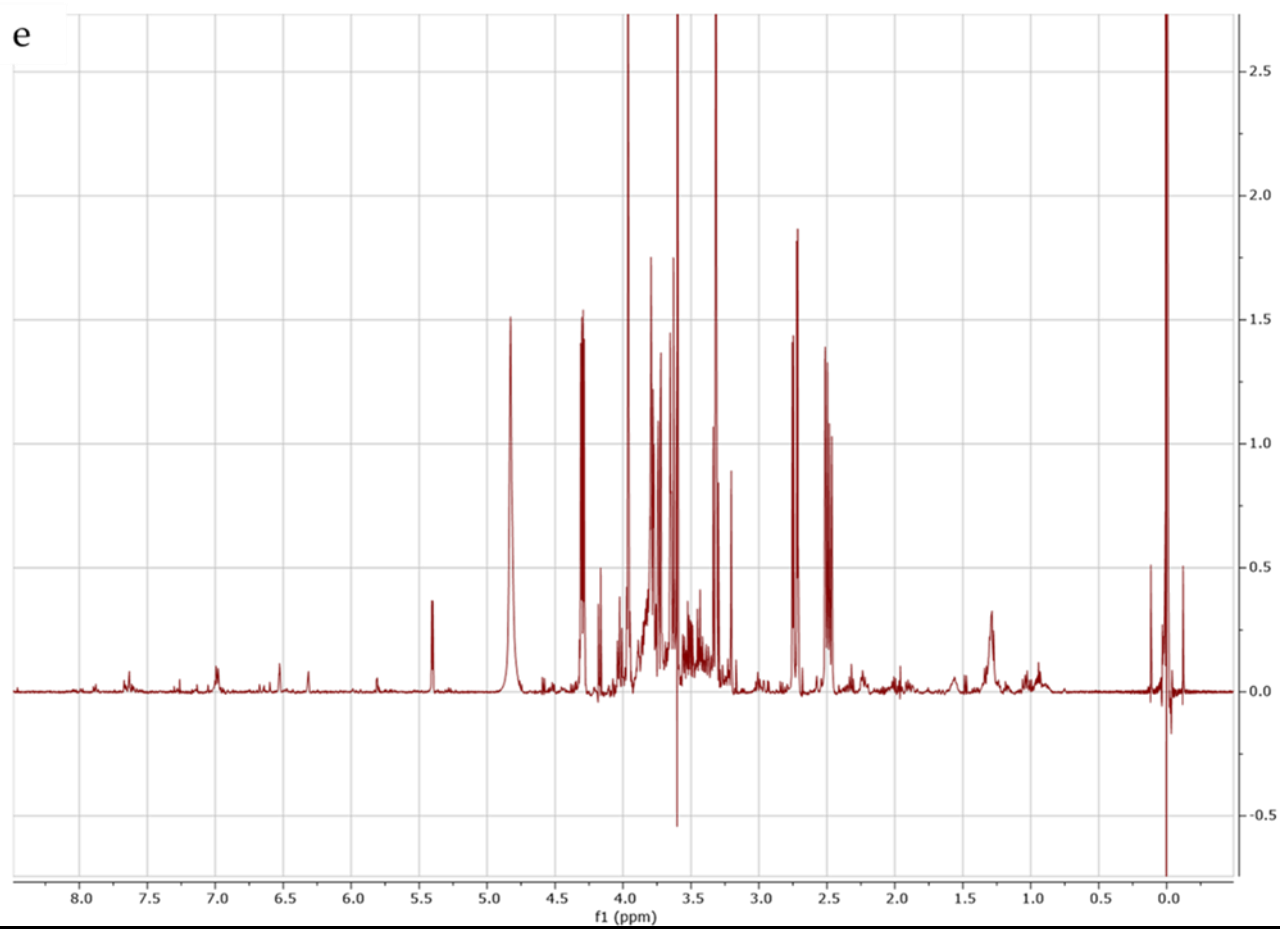

**Figure S4.** Proton nuclear magnetic resonance (<sup>1</sup>H NMR) spectrum of 80 % aqueous-methanol plant extract of *Vachellia karroo* (a), *Vachellia kosiensis* (b), *Vachellia sieberiana* (c), *Vachellia tortilis* (d) and *Vachellia xanthophloea* (e) acquired on a 600 MHz NMR.
